# Supplementary material for: The hypothalamic–pituitary–gonadal axis controls muscle stem cell senescence through autophagosome clearance
Source: PubMed Central journal article supplement — J Cachexia Sarcopenia Muscle. 2020 Nov 27;12(1):177–91. doi: 10.1002/jcsm.12653 (PMC7890269; doi:10.1002/jcsm.12653), 2020-11-27
Supplement: JCSM-12-177-s005.pdf [file JCSM-12-177-s005.pdf]

**Table 1. List of autophagy-related and lysosomal genes**

| Autophagy related gene |                                                                                             | Fold (dKO/WT) FPKM |
|------------------------|---------------------------------------------------------------------------------------------|--------------------|
| Transcript_ID          | Gene Symbol                                                                                 |                    |
| Akt1                   | NM_001165894,NM_001331107,NM_009652                                                         | 1.04152785         |
| Akt2                   | NM_001110208,NM_001331108,NM_001331109,NM_007434                                            | 1.516707076        |
| Akt3                   | NM_011785                                                                                   | 0.653549204        |
| Ambra1                 | NM_001080754,NM_172669                                                                      | 0.670108098        |
| Arnt                   | NM_001037737,NM_009709                                                                      | 1.365689916        |
| Arsa                   | NM_009713                                                                                   | 0.69559157         |
| Arsb                   | NM_009712                                                                                   | 1.166713009        |
| Atf4                   | NM_001287180,NM_009716                                                                      | 1.360851723        |
| Atf6                   | NM_001081304                                                                                | 1.246102694        |
| Atg10                  | NM_025770                                                                                   | 1.103106534        |
| Atg12                  | NM_026217                                                                                   | 0.900724569        |
| Atg13                  | NM_145528                                                                                   | 0.679054661        |
| Atg16l1                | NM_001205391,NM_001205392,NM_029846                                                         | 0.727406983        |
| Atg16l2                | NM_001111111                                                                                | 0.903377486        |
| Atg2a                  | NM_194348                                                                                   | 0.802304915        |
| Atg2b                  | NM_029654                                                                                   | 0.794766931        |
| Atg3                   | NM_026402                                                                                   | 1.019027462        |
| Atg4a                  | NM_174875                                                                                   | 3.291611343        |
| Atg4b                  | NM_174874                                                                                   | 0.941563472        |
| Atg4c                  | NM_001145967,NM_175029                                                                      | 0.812394863        |
| Atg4d                  | NM_153583                                                                                   | 0.909059977        |
| Atg5                   | NM_001314013,NM_053069                                                                      | 0.844644739        |
| Atg7                   | NM_001253717,NM_001253718,NM_028835                                                         | 0.835541416        |
| Atg9a                  | NM_001003917,NM_001288612,NM_001288613,NR_109938                                            | 0.611767779        |
| Atic                   | NM_026195                                                                                   | 0.695724946        |
| Bag1                   | NM_001171739,NM_009736                                                                      | 1.077825142        |
| Bag3                   | NM_013863                                                                                   | 1.389889087        |
| Bak1                   | NM_007523                                                                                   | 0.586819436        |
| Bax                    | NM_007527                                                                                   | 0.927884491        |
| Bcl2                   | NM_009741,NM_177410                                                                         | 0.634075859        |
| Bcl2l1                 | NM_001289716,NM_001289717,NM_001289739,NM_009743                                            | 0.510775653        |
| Becn1                  | NM_019584                                                                                   | 1.017682184        |
| Bid                    | NM_007544                                                                                   | 0.66480366         |
| Birc5                  | NM_001012273,NM_009689                                                                      | 0.562802271        |
| Birc6                  | NM_007566                                                                                   | 0.674090795        |
| Bnip1                  | NM_172149                                                                                   | 1.054219           |
| Bnip3                  | NM_009760                                                                                   | 0.543634997        |
| Bnip3l                 | NM_009761                                                                                   | 0.76252338         |
| Brsk1                  | NM_001003920,NM_001168572                                                                   | 0.945815484        |
| Brsk2                  | NM_001009929,NM_001009930,NM_001276763,NM_029426                                            | 0.993556557        |
| Calcoco1               | NM_026192                                                                                   | 0.824858151        |
| Camk1                  | NM_133926                                                                                   | 0.85806499         |
| Camk1d                 | NM_001290374,NM_001290375,NM_001290376,NM_177343                                            | 0.290755355        |
| Camk2a                 | NM_001286809,NM_009792,NM_177407                                                            | 1.104101804        |
| Camk2b                 | NM_001174053,NM_001174054,NM_007595                                                         | 0.753420225        |
| Camk2d                 | NM_001025438,NM_001025439,NM_001293663,NM_001293664,NM_001293665,NM_001293666,NM_001346635, | 1.024833253        |
| Camk2g                 | NM_001039138,NM_001039139,NM_178597                                                         | 0.687626908        |
| Camkk2                 | NM_001199676,NM_145358                                                                      | 0.873931185        |
| Canx                   | NM_001110499,NM_001110500,NM_007597                                                         | 0.956361633        |
| Capn1                  | NM_001110504,NM_007600                                                                      | 0.476843923        |
| Capn10                 | NM_011796                                                                                   | 0.642624471        |
| Capn2                  | NM_009794                                                                                   | 0.85384706         |
| Capns1                 | NM_009795                                                                                   | 1.236429956        |
| Casp3                  | NM_001284409,NM_009810                                                                      | 1.14920436         |
| Casp4                  | NM_007609                                                                                   | 1.755864439        |
| Casp8                  | NM_001080126,NM_001277926,NM_009812                                                         | 0.457485224        |
| Ccl2                   | NM_011333                                                                                   | 1.31251628         |
| Cd46                   | NM_010778,NR_132621                                                                         | 1.660346427        |
| Cdkn1a                 | NM_001111099,NM_007669                                                                      | 1.3150469          |
| Cdkn1b                 | NM_009875                                                                                   | 0.72901239         |
| Cdkn2a                 | NM_001040654,NM_009877                                                                      | 1.583658386        |
| Cflar                  | NM_001289704,NM_001293804,NM_001293805,NM_009805,NM_207653                                  | 0.762524838        |
| Chd9                   | NM_001310530,NM_177224                                                                      | 0.524403344        |
| Chmp2b                 | NM_026879                                                                                   | 0.742755418        |
| Chmp4b                 | NM_029362                                                                                   | 1.54774515         |
| Cln3                   | NM_001146311,NM_001329789,NM_009907                                                         | 0.752824734        |
| Ctsb                   | NM_007798                                                                                   | 0.959215301        |
| Ctsd                   | NM_009983                                                                                   | 0.700115412        |
| Cx3cl1                 | NM_009142                                                                                   | 0.733591018        |
| Cxcr4                  | NM_009911                                                                                   | 0.525251014        |
| Dapk1                  | NM_001285917,NM_029653,NM_134062                                                            | 0.400251005        |
| Dapk2                  | NM_010019                                                                                   | 0.492992223        |
| Dclk1                  | NM_001111051,NM_001111052,NM_001111053,NM_001195538,NM_001195539,NM_001195540,NM_019978     | 1.06825559         |
| Ddit3                  | NM_001290183,NM_007837                                                                      | 0.918853062        |
| Dlc1                   | NM_001194940,NM_001194941,NM_015802                                                         | 0.926632475        |
| Dnajb1                 | NM_001308227,NM_018808                                                                      | 0.947180563        |
| Dnajb9                 | NM_013760                                                                                   | 1.183371299        |
| Dram1                  | NM_027878                                                                                   | 0.867559688        |
| Edem1                  | NM_138677                                                                                   | 1.214452196        |
| Eef2                   | NM_007907                                                                                   | 1.044279426        |
| Eef2k                  | NM_001267710,NM_001267711,NM_007908                                                         | 0.736342291        |
| Egfr                   | NM_007912,NM_207655                                                                         | 0.770422436        |
| Eif2ak2                | NM_011163                                                                                   | 0.983407689        |
| Eif2ak3                | NM_001313918,NM_010121                                                                      | 0.6115173          |
| Eif2s1                 | NM_026114                                                                                   | 1.10550139         |

|           |                                                                            |             |
|-----------|----------------------------------------------------------------------------|-------------|
| Eif4ebp1  | NM_007918                                                                  | 1.456658975 |
| Eif4g1    | NM_001304432,NM_145941                                                     | 1.229163942 |
| Erbp2     | NM_001003817                                                               | 0.805844829 |
| Ern1      | NM_023913                                                                  | 0.763086926 |
| Ero1l     | NM_015774                                                                  | 0.743086508 |
| Fadd      | NM_010175                                                                  | 0.544792604 |
| Fas       | NM_001146708,NM_007987                                                     | 1.958661743 |
| Fkbp1a    | NM_001302077,NM_001302078,NM_001302079,NM_001302080,NM_008019,NR_126058    | 1.070455779 |
| Fkbp1b    | NM_016863                                                                  | 0.54203646  |
| Fos       | NM_010234                                                                  | 0.652335256 |
| Foxo1     | NM_019739                                                                  | 0.479010676 |
| Foxo3     | NM_019740                                                                  | 0.366526099 |
| Gaa       | NM_001159324,NM_008064                                                     | 0.812377663 |
| Gabarap   | NM_019749                                                                  | 1.117269999 |
| Gabarapl1 | NM_020590                                                                  | 1.046835981 |
| Gabarapl2 | NM_026693                                                                  | 1.049236267 |
| Gapdh     | NM_001289726,NM_008084                                                     | 0.997619265 |
| Gnai3     | NM_010306                                                                  | 1.108063881 |
| Gopc      | NM_001199272,NM_053187                                                     | 1.072856603 |
| Grid2     | NM_008167                                                                  | 1.029286657 |
| Harbi1    | NM_178724                                                                  | 0.506414184 |
| Hdac1     | NM_008228                                                                  | 1.067718748 |
| Hdac6     | NM_001130416,NM_010413                                                     | 0.965988386 |
| Hgs       | NM_001159328,NM_008244                                                     | 0.70610508  |
| Hif1a     | NM_001313919,NM_001313920,NM_010431                                        | 0.927935912 |
| Hsp90ab1  | NM_008302                                                                  | 1.284824003 |
| Hspa5     | NM_001163434,NM_022310                                                     | 1.823695803 |
| Hspa8     | NM_031165                                                                  | 1.539300849 |
| Hspb8     | NM_030704                                                                  | 0.637655811 |
| Ikbkb     | NM_001159774,NM_010546                                                     | 0.672293424 |
| Ikbke     | NM_019777                                                                  | 0.775599903 |
| Itga3     | NM_001306071,NM_001306162,NM_013565                                        | 0.394457312 |
| Itga6     | NM_001277970,NM_008397                                                     | 0.432925766 |
| Itgb1     | NM_010578                                                                  | 0.993172081 |
| Itgb4     | NM_001005608,NM_133663                                                     | 0.50278557  |
| Itp1      | NM_010585                                                                  | 0.621462516 |
| Kif5b     | NM_008448                                                                  | 0.911144076 |
| Klhl24    | NM_029436                                                                  | 0.579468895 |
| Lamp1     | NM_001317353,NM_010684                                                     | 0.869730343 |
| Lamp2     | NM_001017959,NM_001290485,NM_010685                                        | 1.005292194 |
| Map1lc3a  | NM_025735,NR_046364                                                        | 1.291515159 |
| Map1lc3b  | NM_026160                                                                  | 0.785091529 |
| Map2k7    | NM_001042557,NM_001164172,NM_001291777,NM_001291778,NM_001291783,NM_011944 | 0.921468457 |
| Mapk1     | NM_001038663,NM_011949                                                     | 1.089654814 |
| Mapk3     | NM_011952                                                                  | 0.80191652  |
| Mapk8     | NM_001310452,NM_001310453,NM_001310454,NM_016700                           | 0.943699449 |
| Mapk8ip1  | NM_001202445,NM_001202446,NM_011162                                        | 0.877007815 |
| Mapk9     | NM_001163671,NM_001163672,NM_016961,NM_207692                              | 0.657279068 |
| Mark1     | NM_145515                                                                  | 0.727172137 |
| Mark2     | NM_001080388,NM_001080389,NM_001080390,NM_007928                           | 0.9003664   |
| Mark3     | NM_021516,NM_022801                                                        | 0.937859039 |
| Mark4     | NM_172279                                                                  | 1.192571388 |
| Mbtps2    | NM_172307                                                                  | 0.588137326 |
| Mlst8     | NM_001252463,NM_001252464,NM_001252465,NM_019988                           | 0.619878822 |
| Mtmr14    | NM_026849                                                                  | 0.771109444 |
| Mtor      | NM_020009                                                                  | 0.578882523 |
| Myc       | NM_001177352,NM_001177353,NM_001177354,NM_010849                           | 1.712521386 |
| Myo18a    | NM_001291212,NM_001291213,NM_001291214,NM_001291215,NM_011586              | 0.763588564 |
| Naf1      | NM_001163564                                                               | 1.434272011 |
| Nampt     | NM_021524                                                                  | 1.057596732 |
| Nbr1      | NM_001252220,NM_001252222,NM_001252223,NM_008676                           | 0.62265726  |
| Nckap1    | NM_001290745,NM_016965                                                     | 0.948044403 |
| Nfe2l2    | NM_010902,NR_132727                                                        | 1.195018328 |
| Nfkb1     | NM_008689                                                                  | 3.674532901 |
| Npc1      | NM_008720                                                                  | 0.606662889 |
| Nrg2      | NM_001167891                                                               | 0.826595996 |
| Nuak1     | NM_001004363                                                               | 0.66098321  |
| Nuak2     | NM_001195025,NM_028778                                                     | 0.413695212 |
| P4hb      | NM_011032                                                                  | 1.072379633 |
| Park2     | NM_001317726,NM_016694                                                     | 1.906204233 |
| Parp1     | NM_007415                                                                  | 0.780672149 |
| Pelp1     | NM_029231                                                                  | 0.83856522  |
| Pex14     | NM_019781                                                                  | 1.024323228 |
| Pex3      | NM_001164195,NM_001347361,NM_019961                                        | 1.049393089 |
| Phldb2    | NM_001252442,NM_153412                                                     | 0.559850122 |
| Pik3c3    | NM_181414                                                                  | 0.678415678 |
| Pik3r4    | NM_001081309                                                               | 0.686801869 |
| Pink1     | NM_026880                                                                  | 1.029291142 |
| Plk3      | NM_001313916,NM_013807                                                     | 1.306001726 |
| Plk4      | NM_011495,NM_173169,NR_045576                                              | 0.545069489 |
| Pnck      | NM_001199351,NM_001199352,NM_012040                                        | 1.351951378 |
| Ppp1r15a  | NM_008654                                                                  | 1.09454212  |
| Prkaa1    | NM_001013367                                                               | 0.88046577  |
| Prkaa2    | NM_178143                                                                  | 0.543123464 |
| Prkab1    | NM_031869                                                                  | 0.920866854 |
| Prkar1a   | NM_001313973,NM_001313974,NM_001313975,NM_001313976,NM_021880              | 1.223976496 |
| Prkcd     | NM_001310682,NM_011103                                                     | 0.781385056 |
| Prkcq     | NM_008859                                                                  | 0.76499414  |
| Pten      | NM_008960                                                                  | 0.764616731 |

|         |                                                                                             |             |
|---------|---------------------------------------------------------------------------------------------|-------------|
| Rab11a  | NM_017382                                                                                   | 1.027775467 |
| Rab24   | NM_009000                                                                                   | 0.782412612 |
| Rab33b  | NM_016858                                                                                   | 0.78688964  |
| Rab5a   | NM_025887                                                                                   | 1.122254112 |
| Rac1    | NM_001347530,NM_009007                                                                      | 0.981629189 |
| Raf1    | NM_029780                                                                                   | 1.018891381 |
| Rb1     | NM_009029                                                                                   | 0.72802385  |
| Rb1cc1  | NM_009826                                                                                   | 0.969692087 |
| Rela    | NM_009045                                                                                   | 1.590325065 |
| Rgs19   | NM_001291205,NM_001291206,NM_001291207,NM_001291208,NM_001291209,NM_001291210,NM_026446     | 0.739244944 |
| Rheb    | NM_053075                                                                                   | 1.334419254 |
| Rock1   | NM_009071                                                                                   | 1.13215381  |
| Rps6kb1 | NM_001114334,NM_028259                                                                      | 0.986794697 |
| Rps6kb2 | NM_021485                                                                                   | 1.086386716 |
| Rptor   | NM_001306081,NM_028898                                                                      | 0.99996811  |
| Sar1a   | NM_009120                                                                                   | 1.172619322 |
| Sesn2   | NM_144907                                                                                   | 2.527697062 |
| Sgk1    | NM_001161845,NM_001161847,NM_001161848,NM_001161849,NM_001161850,NM_011361                  | 1.358906753 |
| Sgk3    | NM_001037759,NM_133220,NM_177547                                                            | 0.593805662 |
| Sh3glb1 | NM_001282037,NM_001282042,NM_019464                                                         | 0.880141505 |
| Sik1    | NM_010831                                                                                   | 1.348378955 |
| Sik2    | NM_178710                                                                                   | 1.096405036 |
| Sirt1   | NM_001159589,NM_019812                                                                      | 0.998104645 |
| Sirt2   | NM_001122765,NM_001122766,NM_022432                                                         | 0.911608031 |
| Snrk    | NM_001164572,NM_133741                                                                      | 0.600506881 |
| Sphk1   | NM_001172472,NM_001172473,NM_001172475,NM_011451,NM_025367                                  | 1.156804149 |
| Spns1   | NM_023712,NR_045537                                                                         | 0.915671211 |
| Sqstm1  | NM_001290769,NM_011018                                                                      | 1.490557019 |
| St13    | NM_133726                                                                                   | 0.770458821 |
| Stk11   | NM_001301853,NM_001301854,NM_011492,NR_126043                                               | 1.201221836 |
| Stk36   | NM_175031                                                                                   | 0.686055076 |
| Tbk1    | NM_019786                                                                                   | 1.073030941 |
| Thoc5   | NM_172438                                                                                   | 0.813066534 |
| Tm9sf1  | NM_028780                                                                                   | 0.889309889 |
| Tnfsf10 | NM_009425                                                                                   | 0.653010846 |
| Tpr     | NM_133780                                                                                   | 0.823955829 |
| Tsc1    | NM_001289575,NM_001289576,NM_022887                                                         | 0.544236048 |
| Tsc2    | NM_001039363,NM_001286713,NM_001286714,NM_001286716,NM_001286718,NM_001286720,NM_011647     | 0.889311605 |
| Tusc1   | NM_026954                                                                                   | 0.716458564 |
| Ulk1    | NM_001347394,NM_009469                                                                      | 0.818495582 |
| Ulk2    | NM_013881                                                                                   | 0.7340456   |
| Ulk3    | NM_027895                                                                                   | 0.442291624 |
| Usp10   | NM_001310630,NM_009462                                                                      | 1.370274858 |
| Uvrag   | NM_178635                                                                                   | 0.845424643 |
| Vamp3   | NM_009498                                                                                   | 0.826327849 |
| Vegfa   | NM_001025250,NM_001025257,NM_001110266,NM_001110267,NM_001110268,NM_001287056,NM_001287057, | 1.447058532 |
| Wdfy3   | NM_172882                                                                                   | 0.631654683 |
| Wdr45   | NM_001290792,NM_001290794,NM_001290795,NM_172372                                            | 0.696885033 |
| Wipi1   | NM_145940                                                                                   | 0.729320291 |
| Wipi2   | NM_178398                                                                                   | 1.08366138  |
| Zfyve1  | NM_183154                                                                                   | 0.630209057 |

## Lysosomal gene

| Transcript ID | Gene Symbol                                                                               | Fold (dKO/WT) FPKM |
|---------------|-------------------------------------------------------------------------------------------|--------------------|
| Abca2         | NM_007379                                                                                 | 0.742108636        |
| Abca5         | NM_147219                                                                                 | 0.70134193         |
| Abcb9         | NM_019875                                                                                 | 0.62342561         |
| Acp2          | NM_007387                                                                                 | 0.716816148        |
| Ada           | NM_001272052,NM_007398                                                                    | 0.825476572        |
| Adam8         | NM_001291066,NM_007403                                                                    | 0.303014501        |
| Aga           | NM_001005847,NM_001205054                                                                 | 1.31795298         |
| Ank3          | NM_009670,NM_146005,NM_170687,NM_170688,NM_170689,NM_170690,NM_170728,NM_170729,NM_170730 | 0.84970901         |
| Ankrd27       | NM_145633,NM_178263                                                                       | 0.663426492        |
| Anxa11        | NM_013469                                                                                 | 0.913850339        |
| Ap1b1         | NM_001243043,NM_001243044,NM_007454                                                       | 0.744808019        |
| Ap1g1         | NM_001301211,NM_009677                                                                    | 1.191132495        |
| Ap1g2         | NM_001303502,NM_007455                                                                    | 0.621635679        |
| Ap1m1         | NM_007456                                                                                 | 1.082396425        |
| Ap1s1         | NM_007457                                                                                 | 0.716771793        |
| Ap1s2         | NM_001290378,NM_001290379,NM_026887                                                       | 0.797388028        |
| Ap1s3         | NM_183027                                                                                 | 0.329203608        |
| Ap3b1         | NM_009680                                                                                 | 0.788468905        |
| Ap3b2         | NM_021492                                                                                 | 0.839873357        |
| Ap3d1         | NM_007460                                                                                 | 0.725971141        |
| Ap3m1         | NM_018829                                                                                 | 0.658429252        |
| Ap3m2         | NM_001122820,NM_029505                                                                    | 0.822238283        |
| Ap3s1         | NM_001303015,NM_009681                                                                    | 1.177049488        |
| Ap3s2         | NM_009682                                                                                 | 0.807277812        |
| Ap4b1         | NM_001163552,NM_001163553,NM_026193                                                       | 0.739516893        |
| Ap4e1         | NM_175550                                                                                 | 0.618973438        |
| Ap4m1         | NM_021392                                                                                 | 0.598945112        |
| Ap4s1         | NM_001329698,NM_001329699,NM_021710                                                       | 0.860305468        |
| Arl8a         | NM_026823                                                                                 | 0.857349863        |
| Arl8b         | NM_026011                                                                                 | 1.066760181        |
| Arsa          | NM_009713                                                                                 | 0.69559157         |
| Arsb          | NM_009712                                                                                 | 1.166713009        |
| Arsg          | NM_001166177,NM_028710                                                                    | 0.868308152        |
| Asah1         | NM_019734                                                                                 | 0.912351184        |
| Ass1          | NM_007494                                                                                 | 0.539458261        |
| Atp13a2       | NM_001164366,NM_029097                                                                    | 0.665921002        |
| Atp5b         | NM_016774                                                                                 | 1.301146959        |
| Atp6ap1       | NM_018794                                                                                 | 1.042381238        |
| Atp6v0a1      | NM_001243049,NM_001243050,NM_001243051,NM_016920                                          | 0.826822714        |
| Atp6v0a2      | NM_011596                                                                                 | 0.643056855        |
| Atp6v0b       | NM_033617                                                                                 | 0.928077785        |
| Atp6v0c       | NM_009729                                                                                 | 1.163761306        |
| Atp6v0d1      | NM_013477                                                                                 | 1.143117426        |
| Atp6v1g1      | NM_024173                                                                                 | 0.846749787        |
| Atp6v1h       | NM_001310442,NM_133826                                                                    | 1.068690788        |
| Bcl10         | NM_009740                                                                                 | 1.197693224        |
| Calcr1        | NM_018782                                                                                 | 0.585164871        |
| Cat           | NM_009804                                                                                 | 0.749634125        |
| Ccdc115       | NM_027159                                                                                 | 1.214157899        |
| Ccz1          | NM_177682                                                                                 | 0.643014018        |
| Cd164         | NM_016898                                                                                 | 0.789369831        |
| Cd1d1         | NM_007639                                                                                 | 0.791155343        |
| Cd63          | NM_001042580,NM_001282966,NM_007653                                                       | 1.2933345          |
| Cd68          | NM_001291058,NR_110993                                                                    | 0.491121481        |
| Cd74          | NM_001042605,NM_010545                                                                    | 0.247922264        |
| Ces1d         | NM_053200                                                                                 | 4.104562929        |
| Chid1         | NM_001142681,NM_026522                                                                    | 0.771698177        |
| Clcn7         | NM_001317404,NM_011930                                                                    | 0.583630568        |
| Cln3          | NM_001146311,NM_001329789,NM_009907                                                       | 0.752824734        |
| Cln5          | NM_001033242                                                                              | 0.693214635        |
| Clta          | NM_001080384,NM_001080385,NM_001080386,NM_001290470,NM_016760                             | 0.784016956        |
| Cltb          | NM_001347512,NM_028870                                                                    | 1.603303232        |
| Cltc          | NM_001003908                                                                              | 1.166137601        |
| Creg1         | NM_011804                                                                                 | 0.765734729        |
| Cst3          | NM_009976                                                                                 | 0.671637983        |
| Ctbs          | NM_001293672,NM_028836                                                                    | 0.707694788        |
| Ctns          | NM_031251                                                                                 | 0.661902706        |
| Ctsa          | NM_001038492,NM_008906                                                                    | 0.821533006        |
| Ctsb          | NM_007798                                                                                 | 0.959215301        |
| Ctsc          | NM_001311790,NM_009982                                                                    | 0.664977521        |
| Ctsd          | NM_009983                                                                                 | 0.700115412        |
| Ctsf          | NM_019861                                                                                 | 0.881014019        |
| Ctsh          | NM_001312649,NM_007801                                                                    | 0.594149702        |
| Ctsk          | NM_007802                                                                                 | 0.460798199        |
| Ctsl          | NM_009984                                                                                 | 0.957597451        |
| Ctso          | NM_177662                                                                                 | 0.909375008        |
| Ctss          | NM_001267695,NM_021281                                                                    | 0.206872278        |
| Ctsz          | NM_022325                                                                                 | 0.973884973        |
| Cubn          | NM_001081084                                                                              | 0.417620454        |
| Dirc2         | NM_153550                                                                                 | 1.202899083        |
| Dnase2a       | NM_010062                                                                                 | 0.738303165        |
| Doc2a         | NM_010069                                                                                 | 0.548262885        |
| Dpp4          | NM_001159543,NM_010074                                                                    | 0.281572239        |
| Dpp7          | NM_031843                                                                                 | 0.793924601        |
| Dram1         | NM_027878                                                                                 | 0.867559688        |
| Dram2         | NM_001025582,NM_001286986,NM_001286987,NM_026013                                          | 0.68212472         |

|         |                                                                                                |             |
|---------|------------------------------------------------------------------------------------------------|-------------|
| Eif5a   | NM_001166589,NM_001166590,NM_001166591,NM_001166592,NM_001166593,NM_001166594,NM_001166595,NM_ | 1.753971241 |
| Enpep   | NM_007934                                                                                      | 0.442523382 |
| Entpd4  | NM_026174,NM_026174_dup1                                                                       | 0.91290902  |
| Epr1    | NM_134065                                                                                      | 0.762718083 |
| Fam20c  | NM_030565                                                                                      | 0.752443466 |
| Fgfr3   | NM_001163215,NM_001163216,NM_001163217,NM_001205270,NM_008010                                  | 0.807240554 |
| Flot1   | NM_008027                                                                                      | 1.001450379 |
| Flot2   | NM_001040403,NM_001284227,NM_001284228,NM_008028                                               | 0.906766868 |
| Fnbp1   | NM_001038700,NM_001177648,NM_001177649,NM_001177650,NM_019406                                  | 0.737058249 |
| Fth1    | NM_010239,NR_073181                                                                            | 0.969217316 |
| Ftl1    | NM_010240                                                                                      | 1.113490686 |
| Fuca1   | NM_024243                                                                                      | 1.10823658  |
| Fuca2   | NM_001330198,NM_025799                                                                         | 0.800110363 |
| Fyco1   | NM_001110253,NM_148925                                                                         | 0.515736477 |
| Gaa     | NM_001159324,NM_008064                                                                         | 0.812377663 |
| Gabarap | NM_019749                                                                                      | 1.117269999 |
| Galc    | NM_008079                                                                                      | 0.536354062 |
| Gains   | NM_001193645,NM_016722                                                                         | 0.595717831 |
| Gba     | NM_001077411,NM_008094,NR_122037                                                               | 0.89640294  |
| Gga1    | NM_145929                                                                                      | 0.870450784 |
| Gga2    | NM_028758                                                                                      | 0.804295355 |
| Gga3    | NM_001252067,NM_173048                                                                         | 0.752516531 |
| Ggh     | NM_010281                                                                                      | 1.128419622 |
| Gimap5  | NM_175035                                                                                      | 0.222828906 |
| Gja1    | NM_010288                                                                                      | 0.468244259 |
| Gla     | NM_013463                                                                                      | 1.533217196 |
| Glb1    | NM_009752,NR_108101,NR_108102                                                                  | 0.752173168 |
| Gm2a    | NM_010299                                                                                      | 0.935584263 |
| Gnptab  | NM_001004164                                                                                   | 0.594194763 |
| Gnptg   | NM_001346737,NM_172529                                                                         | 0.880556186 |
| Gns     | NM_029364                                                                                      | 0.664357132 |
| Got1    | NM_010324                                                                                      | 0.580095685 |
| Gpc3    | NM_016697                                                                                      | 0.724936934 |
| Gpr137b | NM_031999                                                                                      | 0.744637579 |
| Grn     | NM_008175                                                                                      | 0.758495696 |
| Gusb    | NM_010368                                                                                      | 0.716414807 |
| H2-Aa   | NM_010378                                                                                      | 0.17110578  |
| H2-DMa  | NM_010386                                                                                      | 0.974492214 |
| H2-Eb1  | NM_010382                                                                                      | 0.209144311 |
| Hexa    | NM_010421                                                                                      | 0.836337476 |
| Hexb    | NM_010422                                                                                      | 0.893660641 |
| Hgsnat  | NM_029884                                                                                      | 0.812513364 |
| Hps4    | NM_138646                                                                                      | 1.087283401 |
| Hpse    | NM_152803                                                                                      | 1.227157659 |
| Hyal1   | NM_001331161,NM_008317                                                                         | 0.499435491 |
| Hyal2   | NM_010489                                                                                      | 0.728426636 |
| Hyal3   | NM_178020                                                                                      | 0.942715206 |
| Ids     | NM_010498                                                                                      | 0.761230707 |
| Idua    | NM_008325,NM_172997                                                                            | 0.557967404 |
| Ifi30   | NM_023065                                                                                      | 0.622756548 |
| Ifitm3  | NM_025378                                                                                      | 1.226212152 |
| Igf2r   | NM_010515                                                                                      | 0.860679992 |
| Irgm1   | NM_008326                                                                                      | 2.36837688  |
| Itm2c   | NM_022417                                                                                      | 0.920525786 |
| Kif2a   | NM_001145779,NM_008442                                                                         | 1.499589879 |
| Lamp1   | NM_001317353,NM_010684                                                                         | 0.869730343 |
| Lamp2   | NM_001017959,NM_001290485,NM_010685                                                            | 1.005292194 |
| Lamtor1 | NM_025605                                                                                      | 0.590896765 |
| Lamtor2 | NM_031248                                                                                      | 0.885257912 |
| Laptm4a | NM_008640                                                                                      | 0.917325304 |
| Laptm4b | NM_033521                                                                                      | 0.998748436 |
| Laptm5  | NM_010686                                                                                      | 0.112533071 |
| Ldir    | NM_001252658,NM_001252659,NM_010700                                                            | 1.033252808 |
| Lgmn    | NM_011175                                                                                      | 0.682556879 |
| Lipa    | NM_001111100,NM_021460                                                                         | 0.459615814 |
| Litaf   | NM_019980                                                                                      | 1.266467558 |
| Lmbrd1  | NM_001310483,NM_026719                                                                         | 0.925672958 |
| Lpl     | NM_008509                                                                                      | 1.064554603 |
| Lrba    | NM_001077687,NM_001077688,NM_030695                                                            | 0.854455216 |
| M6pr    | NM_010749                                                                                      | 0.874798014 |
| Man2b1  | NM_010764                                                                                      | 0.677682789 |
| Man2b2  | NM_008550                                                                                      | 0.744615697 |
| Manba   | NM_027288                                                                                      | 0.407079578 |
| Manf    | NM_029103                                                                                      | 1.663134637 |
| March2  | NM_001252480,NM_145486,NR_045522,NR_045523                                                     | 0.712571912 |
| March3  | NM_177115                                                                                      | 1.49722734  |
| March8  | NM_001302383,NM_001302384,NM_001302385,NM_027920                                               | 0.667287242 |
| March9  | NM_001033262                                                                                   | 0.78973009  |
| Mcoln1  | NM_053177                                                                                      | 0.724652926 |
| Mfsd8   | NM_028140                                                                                      | 0.841898065 |
| Mmd     | NM_026178                                                                                      | 0.416019443 |
| Mmp13   | NM_008607                                                                                      | 1.029010298 |
| Mt1     | NM_013602                                                                                      | 0.837703465 |
| Mtor    | NM_020009                                                                                      | 0.578882523 |
| Myh1    | NM_030679                                                                                      | 0.847009625 |
| Myo7a   | NM_001256081,NM_001256082,NM_001256083,NM_008663                                               | 0.690706499 |
| Naaa    | NM_001163687,NM_025972                                                                         | 0.847989571 |
| Naga    | NM_008669                                                                                      | 0.745410683 |

|          |                                                                            |             |
|----------|----------------------------------------------------------------------------|-------------|
| Naglu    | NM_013792                                                                  | 0.742121173 |
| Nagpa    | NM_013796,NR_027804                                                        | 0.52264806  |
| Nbr1     | NM_001252220,NM_001252222,NM_001252223,NM_008676                           | 0.62265726  |
| Ncstn    | NM_021607                                                                  | 0.978762497 |
| Neu1     | NM_010893                                                                  | 0.841856532 |
| Nos1     | NM_008712                                                                  | 0.553352675 |
| Npc1     | NM_008720                                                                  | 0.606662889 |
| Npc2     | NM_023409                                                                  | 0.956059498 |
| Ostm1    | NM_172416                                                                  | 0.755689776 |
| P2ry2    | NM_001302346,NM_001302347,NM_008773                                        | 0.682995818 |
| P4hb     | NM_011032                                                                  | 1.072379633 |
| Pcsk9    | NM_153565                                                                  | 0.459124888 |
| Pcyox1   | NM_025823                                                                  | 0.724332143 |
| Pdgfrb   | NM_001146268,NM_008809                                                     | 0.463768229 |
| Pdia3    | NM_007952                                                                  | 1.096902233 |
| Pf4      | NM_019932                                                                  | 0.27647082  |
| Pla2g15  | NM_133792                                                                  | 0.448131545 |
| Plbd1    | NM_025806                                                                  | 0.672600073 |
| Plbd2    | NM_023625                                                                  | 0.953579456 |
| Rab9     | NM_019773                                                                  | 0.860756146 |
| Rilp     | NM_001029938                                                               | 0.532694145 |
| Rnaset2a | NM_001083938                                                               | 1.244386595 |
| Rnaset2b | NM_026611,NM_026611_dup1                                                   | 1.254256633 |
| Rnf13    | NM_001113413,NM_001304454,NM_001304456,NM_011883,NR_130743                 | 0.815407125 |
| Rnf152   | NM_001160368,NM_178779                                                     | 1.084917468 |
| Rptor    | NM_001306081,NM_028898                                                     | 0.99996811  |
| Rraga    | NM_178376                                                                  | 1.081289881 |
| Rragb    | NM_001004154                                                               | 0.672785529 |
| Rragc    | NM_017475                                                                  | 1.018178519 |
| Rragd    | NM_027491                                                                  | 0.698580758 |
| Scarb2   | NM_007644                                                                  | 0.867103418 |
| Scpep1   | NM_029023                                                                  | 1.036202988 |
| Sgsh     | NM_018822                                                                  | 0.704542964 |
| Siae     | NM_011734                                                                  | 0.828619969 |
| Sidt2    | NM_001289668,NM_172257                                                     | 1.132866169 |
| Slc11a2  | NM_001146161,NM_008732                                                     | 1.505842951 |
| Slc15a3  | NM_023044                                                                  | 1.324307751 |
| Slc15a4  | NM_133895                                                                  | 1.062003748 |
| Pld3     | NM_001317355,NM_011116                                                     | 0.875299794 |
| Plekhf1  | NM_024413                                                                  | 0.737878259 |
| Plod1    | NM_011122                                                                  | 0.607042032 |
| Pnpla7   | NM_146251                                                                  | 0.655472457 |
| Pon2     | NM_183308                                                                  | 1.109676718 |
| Ppt1     | NM_008917                                                                  | 1.076307479 |
| Ppt2     | NM_001302393,NM_001302394,NM_001302395,NM_001302396,NM_019441              | 0.600879039 |
| Pqlc2    | NM_145384                                                                  | 0.462731686 |
| Prcp     | NM_028243                                                                  | 0.784018446 |
| Prdx6    | NM_001303408,NM_007453,NR_130150                                           | 1.309336866 |
| Psap     | NM_001146120,NM_001146121,NM_001146122,NM_001146123,NM_001146124,NM_011179 | 0.819065311 |
| Psen1    | NM_008943                                                                  | 1.140826261 |
| Psen2    | NM_001128605,NM_011183                                                     | 1.128807258 |
| Rab14    | NM_026697                                                                  | 1.043776565 |
| Rab27a   | NM_001301230,NM_001301232,NM_023635                                        | 0.536226308 |
| Rab7     | NM_001293652,NM_001293653,NM_001293654,NM_001293655,NM_009005              | 0.916940861 |
| Slc17a5  | NM_001276452,NM_172773                                                     | 0.518545995 |
| Slc26a11 | NM_178743                                                                  | 1.057074126 |
| Slc29a3  | NM_023596                                                                  | 0.419543705 |
| Slc31a1  | NM_175090                                                                  | 1.348744139 |
| Slc36a1  | NM_153139                                                                  | 0.522649796 |
| Slc48a1  | NM_026353                                                                  | 0.59221689  |
| Smpd1    | NM_011421                                                                  | 0.772195954 |
| Smpd13a  | NM_020561                                                                  | 0.531590493 |
| Snap23   | NM_001177792,NM_001177793,NM_009222                                        | 1.112127455 |
| Snapi    | NM_133854                                                                  | 0.678335996 |
| Snx16    | NM_001127191,NM_029068                                                     | 0.85929124  |
| Sort1    | NM_001271599,NM_019972                                                     | 0.698923184 |
| Sphk2    | NM_001172561,NM_020011,NM_203280                                           | 0.877396802 |
| Spns1    | NM_023712,NR_045537                                                        | 0.915671211 |
| Src      | NM_001025395,NM_009271                                                     | 0.889883347 |
| Srgn     | NM_011157                                                                  | 0.679522529 |
| Stx3     | NM_001025307,NM_001286543,NM_011502,NM_152220                              | 1.018774791 |
| Stx7     | NM_016797                                                                  | 0.764295877 |
| Stx8     | NM_018768                                                                  | 0.918914048 |
| Stxbp2   | NM_011503                                                                  | 0.608206473 |
| Sumf1    | NM_145937                                                                  | 1.041363458 |
| Syt7     | NM_018801,NM_173067,NM_173068                                              | 0.395603167 |
| Tcirg1   | NM_001136091,NM_001167784,NM_016921                                        | 0.794643701 |
| Tecpr1   | NM_027410                                                                  | 0.599024286 |
| Thbs1    | NM_001313914,NM_011580                                                     | 0.562591903 |
| Tlr7     | NM_001290755,NM_001290756,NM_001290757,NM_001290758,NM_133211              | 0.20069375  |
| Tm9sf1   | NM_028780                                                                  | 0.889309889 |
| Tmbim1   | NM_027154                                                                  | 1.680520421 |
| Tmem106b | NM_027992                                                                  | 0.388402711 |
| Tmem192  | NM_001163747,NM_028427                                                     | 0.646816375 |
| Tmem55a  | NM_028264                                                                  | 0.70315234  |
| Tmem55b  | NM_001033271,NM_001310505,NM_001310506,NM_001310507                        | 0.915660092 |
| Tmem63a  | NM_144794                                                                  | 0.821888488 |
| Tmem9    | NM_001160145,NM_001160146,NM_025439                                        | 0.782433297 |

|         |                                                  |             |
|---------|--------------------------------------------------|-------------|
| Tmem97  | NM_133706                                        | 1.236361209 |
| Tnfaip3 | NM_001166402,NM_009397                           | 0.292824268 |
| Tpcn1   | NM_145853                                        | 0.746212357 |
| Tpcn2   | NM_146206,NR_132642,NR_132643,NR_132644          | 0.840823146 |
| Tpp1    | NM_009906                                        | 0.636314108 |
| Trim23  | NM_030731                                        | 0.554293044 |
| Trip10  | NM_001242389,NM_001242390,NM_001242391,NM_134125 | 1.347910371 |
| Unc13d  | NM_001009573                                     | 0.561849703 |
| Unc93b1 | NM_001161428,NM_019449                           | 0.696405905 |
| Uvrag   | NM_178635                                        | 0.845424643 |
| Vamp8   | NM_016794                                        | 0.839340123 |
| Vma21   | NM_001081356,NM_001290780,NM_001290781           | 0.825944732 |
| Vps11   | NM_027889                                        | 0.835756058 |
| Vps18   | NM_172269                                        | 0.690352073 |
| Vps33a  | NM_029929                                        | 0.769318632 |
| Vps33b  | NM_178070                                        | 0.66332178  |
| Vps36   | NM_027338                                        | 0.834648299 |
| Vps39   | NM_147153,NM_178851,NR_027618                    | 0.906640658 |
| Vps4b   | NM_009190                                        | 1.012876048 |
| Wdr48   | NM_026236                                        | 0.656493774 |
| Znrf1   | NM_001168621,NM_001168622,NM_001168623,NM_133206 | 0.879788464 |
| Znrf2   | NM_199143                                        | 0.752898083 |
