# Supplementary material for: The hypothalamic–pituitary–gonadal axis controls muscle stem cell senescence through autophagosome clearance
Source: PubMed Central journal article supplement — J Cachexia Sarcopenia Muscle. 2020 Nov 27;12(1):177–91. doi: 10.1002/jcsm.12653 (PMC7890269; doi:10.1002/jcsm.12653), 2020-11-27
Supplement: JCSM-12-177-s006.pdf [file JCSM-12-177-s006.pdf]

Table 2. Representative mass-spectrometric chromatogram and result of steroid profiling for blood samples.

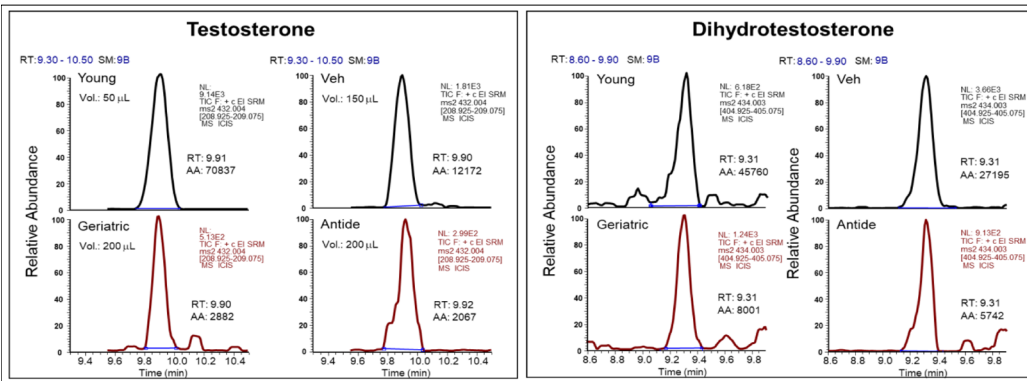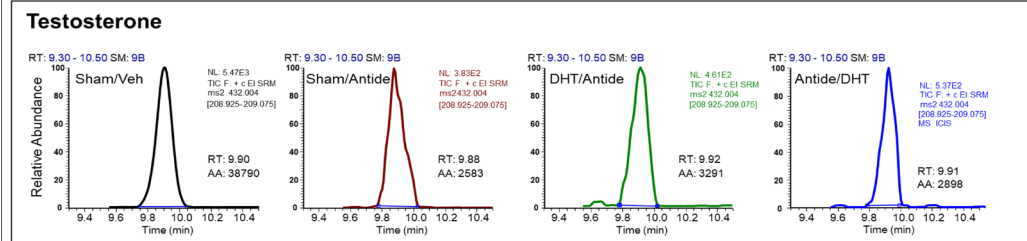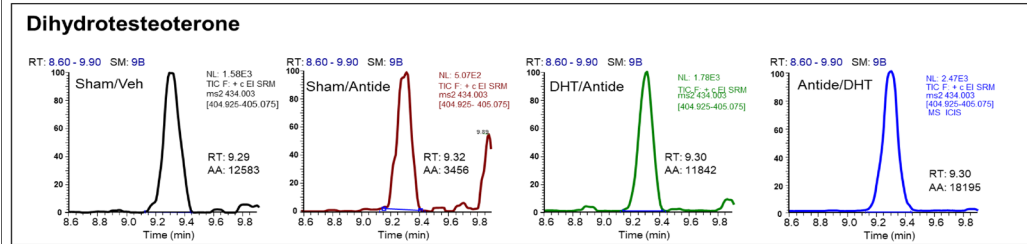

|     | DHT  | A-dione | T    | E2   | 5β-DHP | P-one | Allo-P-one | Preg | Iso-P-one | 5α-DHP | Prog | 20α-DHP | 7α-OH-Pr | THDOC | allo-THDOC | E    | B     | F    | 7α-OH-CH | 7β-OH-CH | Desmosterol | Lathosterol | Lanosterol | 24S-OH-C | Cholesterol |  |
|-----|------|---------|------|------|--------|-------|------------|------|-----------|--------|------|---------|----------|-------|------------|------|-------|------|----------|----------|-------------|-------------|------------|----------|-------------|--|
| Veh | 3.40 | 0.16    | 0.90 | 0.02 |        | 0.80  | 0.22       | 0.29 | 0.66      | 0.97   | 0.21 | 0.10    | 1.90     | 0.28  | 88.66      | 0.11 | 28.11 | 9.57 | 15.22    | 9.85     | 21.83       | 13.84       | 302.45     |          |             |  |
| Ant | 0.25 | 0.05    | 0.30 | 0.01 |        | 2.26  | 0.25       | 0.22 | 1.65      | 2.08   | 0.31 | 0.16    | 2.77     | 0.18  | 227.30     | 0.36 | 12.97 | 7.30 | 7.40     | 5.82     | 12.36       | 9.54        | 237.84     |          |             |  |
| Ant | 0.83 | 0.13    | 0.31 | 0.02 |        | 1.25  | 0.11       | 0.21 | 1.26      | 1.29   | 0.23 | 0.14    | 1.60     | 0.14  | 154.69     | 0.26 | 2.59  | 4.20 | 5.37     | 4.32     | 9.42        | 2.98        | 145.12     |          |             |  |
| Ant | 2.12 | 0.05    | 0.40 | 0.02 |        | 1.01  | 0.21       | 0.18 | 1.59      | 1.92   | 0.25 | 0.20    | 1.44     | 0.15  | 191.71     | 0.28 | 6.55  | 3.25 | 6.70     | 5.00     | 9.06        | 8.15        | 173.52     |          |             |  |

|    |      |      |      |      |  |      |      |      |      |      |      |      |      |      |      |      |       |       |       |       |       |       |        |       |        |  |
|----|------|------|------|------|--|------|------|------|------|------|------|------|------|------|------|------|-------|-------|-------|-------|-------|-------|--------|-------|--------|--|
| Ge | 1.06 | 0.29 | 0.75 | 0.05 |  | 0.66 | 1.10 | 0.27 | 0.10 | 0.25 | 0.46 | 0.35 | 0.15 | 1.44 | 1.24 | 0.59 | 55.36 | 0.12  | 34.58 | 10.53 | 66.34 | 13.73 | 41.00  | 11.90 | 191.82 |  |
| Yo | 5.28 | 0.48 | 9.87 | 0.04 |  | 1.77 | 0.29 | 0.10 | 1.88 | 0.41 | 0.10 | 0.22 | 0.65 | 0.29 | 6.48 | 0.03 | 24.17 | 13.41 | 25.99 | 12.07 | 31.94 | 2.53  | 164.62 |       |        |  |
| Ge | 1.04 | 0.05 | 0.35 | 0.04 |  | 0.33 | 0.57 | 0.30 | 0.10 | 0.10 | 0.33 | 0.15 | 0.13 | 1.69 | 0.94 | 0.14 | 53.52 | 0.15  | 14.77 | 7.01  | 29.33 | 6.02  | 10.48  | 9.96  | 278.22 |  |

|     |      |      |      |      |  |      |      |      |      |      |      |      |      |      |        |      |       |       |       |       |       |       |        |  |  |  |
|-----|------|------|------|------|--|------|------|------|------|------|------|------|------|------|--------|------|-------|-------|-------|-------|-------|-------|--------|--|--|--|
| Veh | 1.22 | 0.15 | 1.82 | 0.03 |  | 1.01 | 0.15 | 0.18 | 1.12 | 1.62 | 0.39 | 0.09 | 1.57 | 0.17 | 162.10 | 0.22 | 6.39  | 4.59  | 5.02  | 4.21  | 7.73  | 6.85  | 149.96 |  |  |  |
| Ant | 0.50 | 0.05 | 0.34 | 0.03 |  | 0.95 | 0.19 | 0.10 | 1.22 | 2.43 | 0.82 | 0.13 | 0.82 | 0.09 | 214.05 | 0.22 | 48.64 | 16.72 | 14.84 | 11.25 | 21.52 | 11.53 | 616.02 |  |  |  |
| Ant | 0.30 | 0.05 | 0.37 | 0.01 |  | 1.65 | 0.12 | 0.20 | 1.80 | 1.22 | 0.22 | 0.10 | 1.85 | 0.34 | 146.98 | 0.29 | 9.14  | 6.41  | 6.23  | 4.59  | 11.13 | 4.60  | 190.77 |  |  |  |
| Ant | 1.13 | 0.11 | 0.33 | 0.01 |  | 1.25 | 0.27 | 0.22 | 1.99 | 2.94 | 0.38 | 0.17 | 1.54 | 0.29 | 212.84 | 0.38 | 5.92  | 3.49  | 5.94  | 3.70  | 7.78  | 6.27  | 172.88 |  |  |  |

|     | Preg*100 | Chol/Des | Chol/Lath | Chol/Lan | Lath/Lan | Desmo/La | 7αOHCh | 7βOHCh | 24SOHCh | E/F   | F/E   | Prog/Prog | Iso-P-one/allo-P-one | 20α-DHP/5α-DHP | DHT/T | E2/T  | A-dione/P | T/A-dione | allo-P-one/Prog | P-one/Prog | allo-THDOC | THDOC/H | B/Prog  |
|-----|----------|----------|-----------|----------|----------|----------|--------|--------|---------|-------|-------|-----------|----------------------|----------------|-------|-------|-----------|-----------|-----------------|------------|------------|---------|---------|
| Veh | 0.741    | 19.875   | 30.711    | 13.854   | 0.451    | 0.697    | 92.951 | 31.626 | 45.770  | 2.474 | 0.404 | 4.328     | 0.438                | 1.219          | 0.219 | 0.681 | 3.776     | 0.027     | 0.160           | 5.790      | 0.830      | 1.958   | 91.424  |
| Ant | 1.045    | 32.136   | 40.844    | 19.237   | 0.471    | 0.599    | 54.549 | 30.692 | 40.112  | 0.506 | 1.978 | 8.386     | 0.136                | 1.365          | 0.147 | 0.794 | 0.838     | 0.042     | 0.024           | 6.000      | 1.083      | 1.329   | 109.092 |
| Ant | 0.761    | 27.047   | 33.579    | 15.410   | 0.459    | 0.570    | 17.860 | 28.913 | 20.562  | 0.530 | 1.887 | 11.715    | 0.169                | 0.992          | 0.178 | 0.976 | 2.670     | 0.078     | 0.100           | 2.401      | 0.968      | 1.237   | 119.632 |
| Ant | 1.236    | 25.904   | 34.709    | 19.145   | 0.552    | 0.739    | 37.744 | 18.750 | 46.988  | 0.517 | 1.936 | 8.941     | 0.112                | 0.632          | 0.131 | 0.829 | 5.330     | 0.040     | 0.026           | 7.947      | 0.524      | 0.753   | 99.946  |

|    |       |       |        |        |       |       |         |        |        |        |       |       |       |       |       |       |       |       |       |        |       |       |        |       |         |
|----|-------|-------|--------|--------|-------|-------|---------|--------|--------|--------|-------|-------|-------|-------|-------|-------|-------|-------|-------|--------|-------|-------|--------|-------|---------|
| Ge | 1.389 | 2.891 | 13.974 | 4.679  | 0.335 | 1.618 | 180.249 | 54.873 | 62.052 | 4.991  | 0.200 | 1.735 | 0.402 | 4.424 | 0.760 | 0.537 | 1.412 | 0.066 | 0.622 | 2.609  | 2.377 | 1.433 | 2.672  | 3.110 | 119.688 |
| Yo | 1.745 | 6.334 | 13.636 | 5.153  | 0.378 | 0.814 | 146.840 | 81.448 | 15.361 | 10.455 | 0.096 | 1.431 | 0.053 | 0.942 | 0.243 | 4.581 | 0.535 | 0.004 | 1.165 | 20.604 | 4.317 | 1.586 | 15.782 |       |         |
| Ge | 1.075 | 9.485 | 46.201 | 26.544 | 0.575 | 2.799 | 53.104  | 25.195 | 35.813 | 0.918  | 1.090 | 1.092 | 1.000 | 5.662 | 0.473 | 0.306 | 2.958 | 0.100 | 0.153 | 7.013  | 1.735 | 0.998 | 2.867  | 5.172 | 163.953 |

|     |       |        |        |        |       |       |        |        |        |       |       |        |       |       |       |       |       |       |       |        |       |       |         |        |
|-----|-------|--------|--------|--------|-------|-------|--------|--------|--------|-------|-------|--------|-------|-------|-------|-------|-------|-------|-------|--------|-------|-------|---------|--------|
| Veh | 0.983 | 29.863 | 35.597 | 19.408 | 0.545 | 0.650 | 42.627 | 30.610 | 45.665 | 0.763 | 1.310 | 11.007 | 0.159 | 0.906 | 0.243 | 0.690 | 0.671 | 0.016 | 0.092 | 12.217 | 0.625 | 0.967 | 0.967   | 99.898 |
| Ant | 0.313 | 41.498 | 54.742 | 28.621 | 0.523 | 0.690 | 78.964 | 27.150 | 18.718 | 1.345 | 0.744 | 12.600 | 0.082 | 0.780 | 0.337 | 0.502 | 1.464 | 0.081 | 0.021 | 6.821  | 0.392 | 1.680 | 0.339   | 87.976 |
| Ant | 0.639 | 30.612 | 41.509 | 17.131 | 0.413 | 0.560 | 47.937 | 33.603 | 24.097 | 1.167 | 0.857 | 9.970  | 0.111 | 0.915 | 0.180 | 1.484 | 0.813 | 0.027 | 0.041 | 7.413  | 1.358 | 1.520 | 120.954 |        |
| Ant | 1.585 | 29.083 | 46.753 | 22.222 | 0.475 | 0.764 | 34.224 | 20.164 | 36.285 | 0.772 | 1.296 | 10.736 | 0.112 | 0.628 | 0.129 | 0.677 | 3.452 | 0.031 | 0.038 | 2.927  | 0.425 | 0.522 | 0.522   | 72.356 |
